# Supplementary material
Source: PubMed Central journal article supplement (PMC3670255)
Supplement: supp_bgt044_SupplementaryTable_1TumorSpectrum.pdf [file supp_bgt044_SupplementaryTable_1TumorSpectrum.pdf]

**Supplementary Table 1 Tumor Spectrum in *Trp53*<sup>-/-</sup> and *Trp53*<sup>-/-</sup>*miR-21*<sup>-/-</sup> mice**

| <b>Tumors in <i>Trp53</i><sup>-/-</sup> mice</b>                            |                    |               |            |
|-----------------------------------------------------------------------------|--------------------|---------------|------------|
| Mice number                                                                 | Histological type  | Anatomic site | Age(days)  |
| 196                                                                         | Malignant lymphoma | Brain         | 36         |
| 569                                                                         | Haemangiosarcoma   | Subcutis      | 196        |
| 971                                                                         | Malignant lymphoma | Thymic        | 103        |
| 517                                                                         | Malignant lymphoma | Thymic        | 186        |
| 520                                                                         | Rhabdomyosarcoma   | Muscle        | 242        |
| 975                                                                         | Malignant lymphoma | liver         | 217        |
| 102                                                                         | Rhabdomyosarcoma   | Muscle        | 174        |
| 104                                                                         | Malignant lymphoma | Brain         | 147        |
| 115                                                                         | Malignant lymphoma | Thymic        | 86         |
| 970                                                                         | Haemangiosarcoma   | Subcutis      | 146        |
| 117                                                                         | Haemangiosarcoma   | Subcutis      | 165        |
| 113                                                                         | Malignant lymphoma | Generalized   | 186        |
| 116                                                                         | Malignant lymphoma | Generalized   | 211        |
| 103                                                                         | Osteosarcoma       | Femur         | 233        |
| 110                                                                         | Malignant lymphoma | Thymic        | 154        |
| 126                                                                         | Malignant lymphoma | Generalized   | 154        |
| 118                                                                         | Malignant lymphoma | Generalized   | 228        |
| 120                                                                         | Osteosarcoma       | Femur         | 226        |
| 1625                                                                        | Rhabdomyosarcoma   | subcutis      | 88         |
| 566                                                                         | Malignant lymphoma | Generalized   | 209        |
| <b>Tumors in <i>Trp53</i><sup>-/-</sup><i>miR-21</i><sup>-/-</sup> mice</b> |                    |               |            |
| Mice number                                                                 | Histological type  | Anatomic site | Age (days) |
| 224                                                                         | Rhabdomyosarcoma   | Muscle        | 140        |
| 202                                                                         | Malignant lymphoma | Generalized   | 188        |

|     |                      |             |     |
|-----|----------------------|-------------|-----|
| 867 | Osteosarcoma         | Face        | 177 |
| 929 | Malignant lymphoma   | Thymic      | 151 |
| 943 | Haemangiosarcoma     | Subcutis    | 170 |
| 236 | Malignant lymphoma   | Thymic      | 131 |
| 686 | Haemangiosarcoma     | Subcutis    | 239 |
| 944 | Malignant lymphoma   | Thymic      | 143 |
| 935 | Unclassified sarcoma | Subcutis    | 200 |
| 938 | Haemangiosarcoma     | Subcutis    | 214 |
| 174 | Haemangiosarcoma     | Subcutis    | 158 |
| 176 | Malignant lymphoma   | Generalized | 186 |
| 129 | Malignant lymphoma   | Thymic      | 165 |
| 133 | Haemangiosarcoma     | Liver       | 257 |
| 684 | Malignant lymphoma   | Subcutis    | 233 |
| 180 | Malignant lymphoma   | Liver       | 262 |
| 178 | Malignant lymphoma   | Thymic      | 223 |
| 235 | Malignant lymphoma   | Generalized | 158 |
| 937 | Malignant lymphoma   | Generalized | 196 |
| 225 | Malignant lymphoma   | Generalized | 205 |
| 132 | Malignant lymphoma   | Generalized | 305 |

---
